# Supplementary material
Source: PubMed Central journal article supplement (PMC9712257)
Supplement: NIHMS1837820-supplement-Supplemental_Digital_Content_2.pdf [file NIHMS1837820-supplement-Supplemental_Digital_Content_2.pdf]

**Appendix 1. Age Distribution at the Baseline Study Visit Among 385 Reproductive-Aged Black Participants in the Study Environment Lifestyle and Fibroids (SELF) Who Had a Leiomyoma Detected at the Baseline Visit**

|                            | Number (%) |
|----------------------------|------------|
| Sociodemographic variables |            |
| Age (years)                |            |
| 23-25                      | 38 (9.9)   |
| 26-28                      | 89 (23.1)  |
| 29-31                      | 118 (30.6) |
| 32-35                      | 140 (36.4) |

Wegienka G, Havstad S, Coleman C, Cooper T, Wesselink A, Upson K, et al. Ultrasound-confirmed, age-specific uterine leiomyoma incidence in a cohort of black individuals. *Obstet Gynecol* 2022;140.

The authors provided this information as a supplement to their article.

©2022 American College of Obstetricians and Gynecologists.

**Appendix 2. Number of Completed Follow-up Study Visits in the Study Environment Lifestyle and Fibroids (SELF) by Age at Baseline Visit**

| Sociodemographic variables | Number of women by total follow-up visits completed (% of all women n=1241) |          |          |            |
|----------------------------|-----------------------------------------------------------------------------|----------|----------|------------|
|                            | 1                                                                           | 2        | 3        | 4          |
| Age (years)                |                                                                             |          |          |            |
| 23-25                      | 21 (1.7)                                                                    | 29 (2.3) | 65 (5.2) | 200 (16.1) |
| 26-28                      | 9 (0.7)                                                                     | 24 (1.9) | 67 (5.4) | 221 (17.8) |
| 29-31                      | 13 (1.0)                                                                    | 21 (1.7) | 54 (4.4) | 239 (19.3) |
| 32-35                      | 9 (0.7)                                                                     | 11 (0.9) | 47 (3.8) | 211 (17.0) |

Wegienka G, Havstad S, Coleman C, Cooper T, Wesselink A, Upson K, et al. Ultrasound-confirmed, age-specific uterine leiomyoma incidence in a cohort of black individuals. *Obstet Gynecol* 2022;140.

The authors provided this information as a supplement to their article.

©2022 American College of Obstetricians and Gynecologists.
